# Supplementary material
Source: MDPI journal article supplement (https://www.mdpi.com/2071-1050/14/20/13186)
Supplement: s1 [file s1]

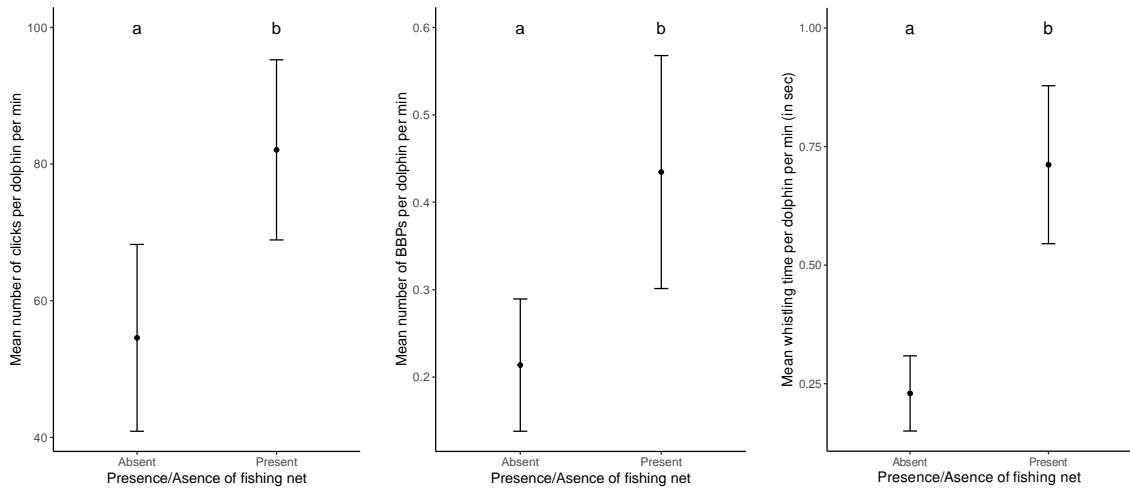

(a) Detected echolocation clicks per audio per dolphin according to absence/presence of a fishing net. (b) Detected BBPs per audio per dolphin according to absence/presence of a fishing net. (c) Identified whistling time per audio per dolphin according to absence/presence of a fishing net.

**Figure S2:** Detected acoustic responses of dolphins in relation with the presence of a fishing net underwater for each type of signal emitted by dolphins (columns). Points are mean values and ranges show 95% confidence intervals. Group with different letters have different mean values (Tukey post-hoc test). *BBP: Buzz or Burst-Pulse*.

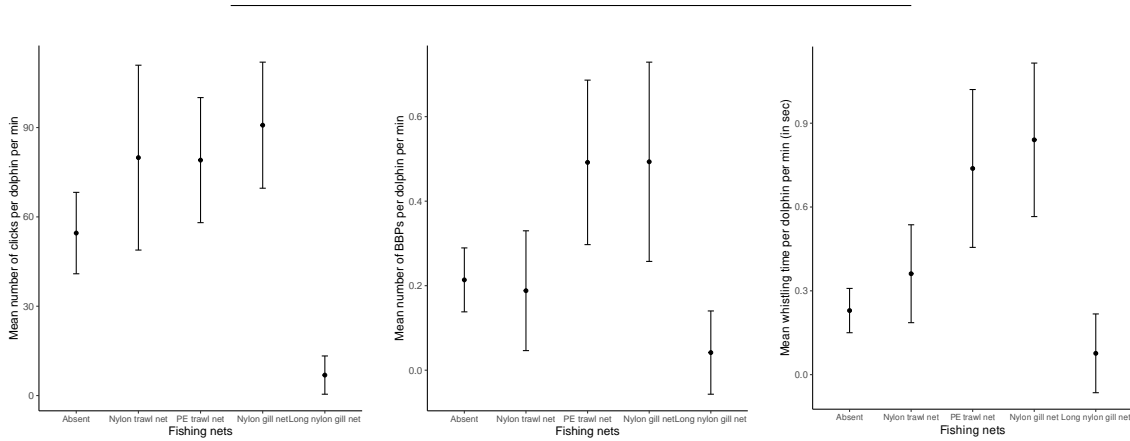

(a) Number of detected echolocation clicks per audio per dolphin for each fishing net type. (b) Number of detected BBPs per audio per dolphin for each fishing net type. (c) Identified whistling time per audio per dolphin for each fishing net type.

**Figure S3:** Detected acoustic responses of dolphins in relation with the type of fishing net that was underwater for each type of signal emitted by dolphins (columns). Points are mean values and ranges show 95% confidence intervals. Kruskal-wallis tests showed significant differences in means for clicks, BBPs and whistles (Chi2 were respectively 47.8, 15.2 and 30.2; with df=4 and  $p < 0.01$  each). Pairwise post-hoc tests are not shown for readability.

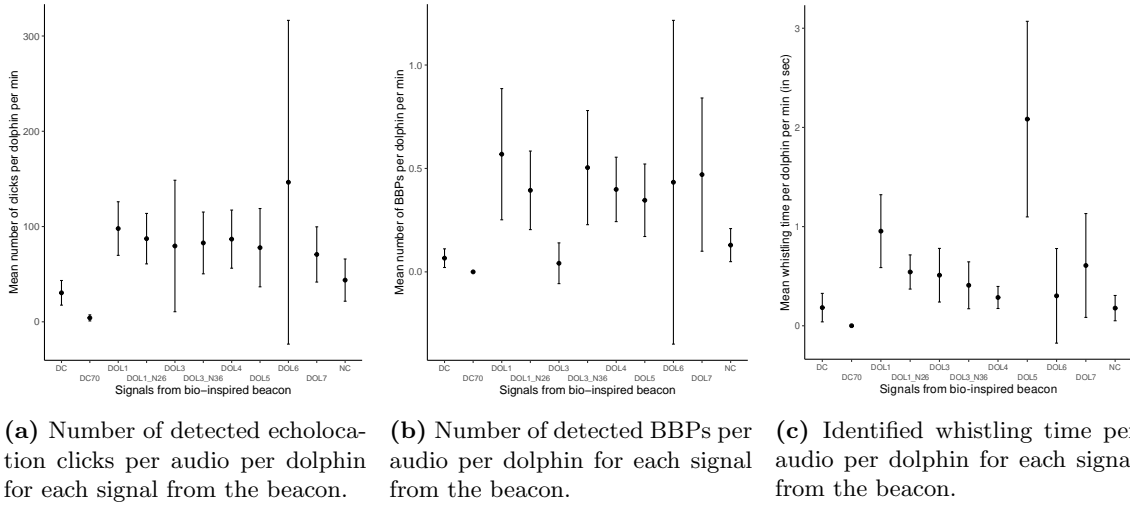

**Figure S4:** Detected acoustic responses of dolphins in relation with the signal emitted by the bio-inspired beacon for each type of signal emitted by dolphins (columns). Points are mean values and ranges show 95% confidence intervals. Kruskal-wallis tests showed significant differences in means for clicks, BBPs and whistles (Chi2 were respectively 69.5, 48.8 and 101.1; with  $df=10$  and  $p<0.01$  each). Pairwise post-hoc tests are not shown for readability. *The code associated with each signal is described in Table S1.*

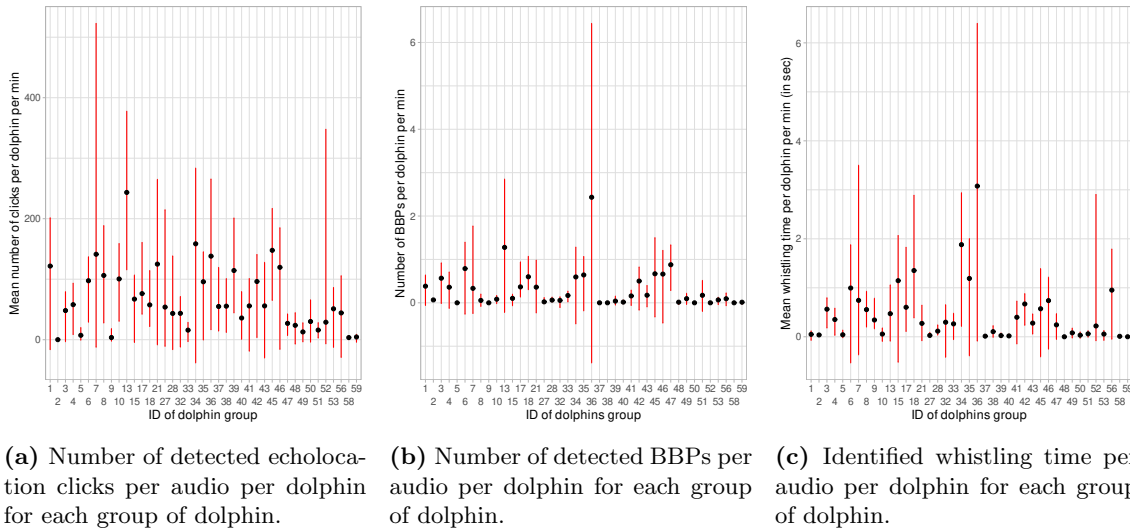

**Figure S5:** Detected acoustic responses of dolphins according to the ID group, for each type of signal emitted by dolphins. Points are mean values and ranges show 95% confidence intervals. *Groups 15, 32, 33, 35, 42, 45, 46, 47 & 59 were sampled several times during separated treatment sequences. Pairwise post-hoc tests not showed for readability. The groups mentioned above could be clustered with other groups of the dataset, no differences were underlined (Kruskal-Wallis post-Hoc test,  $p>0.05$ ) among groups inside each cluster.*

## 2 Supplementary table

**Table S1:** Signification of codes associated with signals emitted by the acoustic beacon. Signals were recorded in a previous experiment, they are returning echoes of echolocation clicks from common dolphins on different types of fishing nets (sometimes with a carcass of a common dolphin manually added in the net, see Section 2.b. for more details). Most signals were emitted with a correction table to adjust features of the material (ceramic) that constitutes the acoustic beacon. **Notes:** DOL7 signal is a returning echo from a click of a *Tursiops truncatus* that was used to test for response of common dolphins to signals generated from clicks of other species. DC (20-200 kHz) and DC70 (20-70 kHz) signals were tested in 2021, they are improved versions of DOL1 signal tested in 2020 (i.e. new prototype emitted more faithfully the signal). PE = polyethylene.

| Code     | Type of net     | Presence of a dolphin carcass       | Correction of emitted frequencies | n Samples |
|----------|-----------------|-------------------------------------|-----------------------------------|-----------|
| DC       | Nylon gill net  | Yes                                 | Yes                               | 51        |
| DC70     | Nylon gill net  | Yes                                 | Yes                               | 22        |
| DOL1     | Nylon gill net  | Yes                                 | Yes                               | 75        |
| DOL1.N26 | Nylon gill net  | Yes                                 | No                                | 45        |
| DOL3     | PE trawl net    | No                                  | Yes                               | 8         |
| DOL3.N36 | Nylon trawl net | No                                  | No                                | 41        |
| DOL4     | PE trawl net    | Yes                                 | Yes                               | 41        |
| DOL5     | Nylon trawl net | No                                  | Yes                               | 11        |
| DOL6     | Nylon trawl net | Yes                                 | Yes                               | 5         |
| DOL7     | Nylon trawl net | Yes<br>( <i>T. truncatus</i> click) | Yes                               | 24        |

**Table S2:** Intensity of response of observed dolphin behaviour according to the signals emitted by the bio-inspired beacon (see Table 1 for signal codes). For a total of 83 observations ('n obs'), including 6 for which intensity of response was not mentioned in the observation grid during the field survey, and 6 observations linked to sequences cancelled (activation of the beacon being too late). This led to 71 observations with a reported intensity of response. See Section 2.2. for a definition of the intensity of response.

| Signal emitted | n groups | n obs | Distance (m) | n Intensity 0 | n Intensity 1 | n Intensity 2 |
|----------------|----------|-------|--------------|---------------|---------------|---------------|
| DC             | 7        | 9     | 20-100       | 0             | 0             | 5             |
| DC70           | 11       | 12    | 10-50        | 1             | 2             | 7             |
| DOL1           | 8        | 22    | 5-300        | 1             | 0             | 20            |
| DOL1.N26       | 4        | 8     | 10-100       | 0             | 1             | 6             |
| DOL3           | 1        | 2     | 30           | 0             | 2             | 0             |
| DOL3.N26       | 5        | 11    | 5-50         | 0             | 7             | 2             |
| DOL4           | 5        | 9     | 10-100       | 2             | 4             | 3             |
| DOL5           | 2        | 4     | 5-15         | 0             | 1             | 3             |
| DOL6           | 2        | 2     | 8            | 0             | 0             | 0             |
| DOL7           | 2        | 4     | 15-50        | 3             | 0             | 1             |
| Total          | 47       | 83    | -            | 7             | 17            | 47            |
